# Supplementary material for: Hawk Tea Flavonoids as Natural Hepatoprotective Agents Alleviate Acute Liver Damage by Reshaping the Intestinal Microbiota and Modulating the Nrf2 and NF-κB Signaling Pathways
Source: MDPI journal article supplement (doi:10.3390/nu14173662), 2022-09-05
Supplement: s1 [file s1]

**Table S1. The list of total 191 metabolites identified in the hawk tea flavonoids**

| Number | Class I    | Class II    | CAS         | Compounds                                                | Content  | Content(%) | OB    | DL   |
|--------|------------|-------------|-------------|----------------------------------------------------------|----------|------------|-------|------|
| 1      | Flavonoids | Isoflavones | 52250-35-8  | 2',7-Dihydroxy-3',4'-dimethoxyisoflavan                  | 1.44E+06 | 0.23       | 4.56  | 0.27 |
| 2      | Flavonoids | Isoflavones | 1156-78-1   | 2'-Hydroxygenistein                                      | 1.25E+05 | 0.02       | ND    | ND   |
| 3      | Flavonoids | Isoflavones | 51011-05-3  | 6"-O-Malonylgenistin                                     | 2.96E+04 | 0.00       | ND    | ND   |
| 4      | Flavonoids | Isoflavones | -           | Genistein-7-O-galactoside-rhamnose                       | 3.61E+05 | 0.06       | ND    | ND   |
| 5      | Flavonoids | Isoflavones | 66026-80-0  | Genistein-8-C-glucoside                                  | 2.43E+07 | 3.88       | 15.27 | 0.72 |
| 6      | Flavonoids | Flavonols   | 1486-70-0   | 3-O-Methylquercetin                                      | 9.74E+04 | 0.02       | 10.1  | 0.3  |
| 7      | Flavonoids | Flavonols   | -           | 6-Hydroxykaempferol-7-O-glucoside                        | 1.23E+06 | 0.20       | 2.87  | 0.78 |
| 8      | Flavonoids | Flavonols   | 572-30-5    | Avicularin(Quercetin-3-O- $\alpha$ -L-arabinofuranoside) | 2.17E+07 | 3.47       | 2.06  | 0.7  |
| 9      | Flavonoids | Flavonols   | 137225-59-3 | Dihydrokaempferide                                       | 8.13E+05 | 0.13       | 23.1  | 0.27 |
| 10     | Flavonoids | Flavonols   | -           | Dihydrokaempferol-7-O-glucoside                          | 1.16E+06 | 0.19       | ND    | ND   |
| 11     | Flavonoids | Flavonols   | 1226-22-8   | Garbanzol                                                | 1.42E+06 | 0.23       | 83.67 | 0.21 |
| 12     | Flavonoids | Flavonols   | -           | Herbacetin-3-O-glucuronide                               | 9.87E+06 | 1.58       | ND    | ND   |
| 13     | Flavonoids | Flavonols   | 480-19-3    | Isorhamnetin                                             | 1.97E+04 | 0.00       | 49.6  | 0.31 |
| 14     | Flavonoids | Flavonols   | 6758-51-6   | Isorhamnetin-3,7-O-diglucoside                           | 1.85E+04 | 0.00       | 13.44 | 0.65 |
| 15     | Flavonoids | Flavonols   | -           | Isorhamnetin-3-O-(6"-acetylglucoside)                    | 3.32E+05 | 0.05       | ND    | ND   |
| 16     | Flavonoids | Flavonols   | 5041-82-7   | Isorhamnetin-3-O-Glucoside                               | 4.36E+05 | 0.07       | 1.17  | 0.8  |
| 17     | Flavonoids | Flavonols   | 55033-90-4  | Isorhamnetin-3-O-neohesperidoside                        | 7.92E+04 | 0.01       | ND    | ND   |
| 18     | Flavonoids | Flavonols   | -           | Isorhamnetin-3-O-rhamnoside                              | 4.70E+04 | 0.01       | ND    | ND   |
| 19     | Flavonoids | Flavonols   | 520-18-3    | Kaempferol (3,5,7,4'-                                    | 8.84E+05 | 0.14       | 41.88 | 0.24 |

|    |            |           |            |                                                       |          |      |       |      |
|----|------------|-----------|------------|-------------------------------------------------------|----------|------|-------|------|
|    |            |           |            | Tetrahydroxyflavone)                                  |          |      |       |      |
| 20 | Flavonoids | Flavonols | 482-38-2   | Kaempferol-3,7-O-dirhamnoside<br>(Kaempferitrin)      | 2.88E+06 | 0.46 | 8.16  | 0.79 |
| 21 | Flavonoids | Flavonols | -          | Kaempferol-3-O-(2"-acetyl)glucoside                   | 1.33E+07 | 2.12 | ND    | ND   |
| 22 | Flavonoids | Flavonols | -          | Kaempferol-3-O-(4"-p-coumaroyl)rhamnoside             | 3.68E+05 | 0.06 | ND    | ND   |
| 23 | Flavonoids | Flavonols | -          | Kaempferol-3-O-(6"-malonyl)galactoside                | 1.16E+06 | 0.19 | ND    | ND   |
| 24 | Flavonoids | Flavonols | -          | Kaempferol-3-O-(6"-malonyl)glucoside                  | 5.87E+04 | 0.01 | ND    | ND   |
| 25 | Flavonoids | Flavonols | 20316-62-5 | Kaempferol-3-O-(6"-p-Coumaroyl)glucoside (Tiliroside) | 4.47E+06 | 0.71 | 1.94  | 0.66 |
| 26 | Flavonoids | Flavonols | 5041-67-8  | Kaempferol-3-O-arabinoside (Juglanin)                 | 1.33E+06 | 0.21 | 2.73  | 0.65 |
| 27 | Flavonoids | Flavonols | 23627-87-4 | Kaempferol-3-O-galactoside (Trifolin)                 | 1.28E+07 | 2.05 | 19.61 | 0.74 |
| 28 | Flavonoids | Flavonols | 480-10-4   | Kaempferol-3-O-glucoside (Astragalin)                 | 2.91E+06 | 0.47 | 2.77  | 0.74 |
| 29 | Flavonoids | Flavonols | -          | Kaempferol-3-O-glucoside-7-O-rhamnoside               | 4.61E+06 | 0.74 | ND    | ND   |
| 30 | Flavonoids | Flavonols | 22688-78-4 | Kaempferol-3-O-glucuronide                            | 2.38E+06 | 0.38 | 2.65  | 0.76 |
| 31 | Flavonoids | Flavonols | 32602-81-6 | Kaempferol-3-O-neohesperidoside                       | 4.23E+06 | 0.68 | 5.78  | 0.75 |
| 32 | Flavonoids | Flavonols | 482-39-3   | Kaempferol-3-O-rhamnoside<br>(Afzelin)(Kaempferin)    | 2.62E+06 | 0.42 | 3.83  | 0.7  |
| 33 | Flavonoids | Flavonols | 16290-07-6 | Kaempferol-7-O-glucoside                              | 1.39E+07 | 2.21 | 2.8   | 0.68 |
| 34 | Flavonoids | Flavonols | 20196-89-8 | Kaempferol-7-O-rhamnoside                             | 2.43E+06 | 0.39 | 2.27  | 0.72 |
| 35 | Flavonoids | Flavonols | -          | Morin-3-O-xyloside                                    | 2.98E+07 | 4.76 | ND    | ND   |
| 36 | Flavonoids | Flavonols | 529-44-2   | Myricetin                                             | 2.93E+05 | 0.05 | 13.75 | 0.31 |
| 37 | Flavonoids | Flavonols | -          | Myricetin-3-O-(6"-acetyl)glucoside                    | 3.07E+04 | 0.00 | ND    | ND   |
| 38 | Flavonoids | Flavonols | -          | Myricetin-3-O-(6"-malonyl)glucoside                   | 1.36E+04 | 0.00 | ND    | ND   |

|    |            |           |             |                                            |          |      |       |      |
|----|------------|-----------|-------------|--------------------------------------------|----------|------|-------|------|
| 39 | Flavonoids | Flavonols | 132679-85-7 | Myricetin-3-O-arabinoside                  | 9.05E+05 | 0.14 | ND    | ND   |
| 40 | Flavonoids | Flavonols | 19833-12-6  | Myricetin-3-O-glucoside                    | 8.62E+06 | 1.38 | 1.43  | 0.79 |
| 41 | Flavonoids | Flavonols | 77363-65-6  | Myricetin-3-O-glucuronide                  | 8.32E+04 | 0.01 | ND    | ND   |
| 42 | Flavonoids | Flavonols | 17912-87-7  | Myricetin-3-O-rhamnoside (Myricitrin)      | 9.72E+04 | 0.02 | 5.08  | 0.77 |
| 43 | Flavonoids | Flavonols | 41093-68-9  | Myricetin-3-O-rutinoside                   | 3.16E+06 | 0.51 | ND    | ND   |
| 44 | Flavonoids | Flavonols | 117-39-5    | Quercetin                                  | 3.16E+06 | 0.51 | 46.43 | 0.28 |
| 45 | Flavonoids | Flavonols | 33429-83-3  | Quercetin-3,4'-Dimethyl Ether              | 3.43E+04 | 0.01 | 12.7  | 0.33 |
| 46 | Flavonoids | Flavonols | 28638-13-3  | Quercetin-3,7-Di-O-rhamnoside              | 3.02E+06 | 0.48 | ND    | ND   |
| 47 | Flavonoids | Flavonols | -           | Quercetin-3-O-(2''-acetyl)glucuronide      | 1.84E+05 | 0.03 | ND    | ND   |
| 48 | Flavonoids | Flavonols | -           | Quercetin-3-O-(2''-Galloyl)Arabinoside     | 6.12E+04 | 0.01 | ND    | ND   |
| 49 | Flavonoids | Flavonols | 59262-54-3  | Quercetin-3-O-(4''-O-glucosyl)rhamnoside   | 4.86E+06 | 0.78 | ND    | ND   |
| 50 | Flavonoids | Flavonols | -           | Quercetin-3-O-(6''-acetyl)galactoside      | 1.18E+07 | 1.89 | ND    | ND   |
| 51 | Flavonoids | Flavonols | -           | Quercetin-3-O-(6''-acetyl)glucoside        | 4.00E+06 | 0.64 | ND    | ND   |
| 52 | Flavonoids | Flavonols | -           | Quercetin-3-O-(6''-malonyl)galactoside     | 2.37E+07 | 3.78 | ND    | ND   |
| 53 | Flavonoids | Flavonols | -           | Quercetin-3-O-(6''-p-Coumaroyl)galactoside | 4.40E+06 | 0.70 | ND    | ND   |
| 54 | Flavonoids | Flavonols | -           | Quercetin-3-O-(6''-p-Coumaroyl)glucoside   | 3.92E+06 | 0.63 | ND    | ND   |
| 55 | Flavonoids | Flavonols | 22255-13-6  | Quercetin-3-O-arabinoside (Guaijaverin)    | 1.70E+07 | 2.72 | 29.65 | 0.7  |
| 56 | Flavonoids | Flavonols | 482-36-0    | Quercetin-3-O-galactoside (Hyperin)        | 4.92E+06 | 0.79 | 6.94  | 0.77 |
| 57 | Flavonoids | Flavonols | 482-35-9    | Quercetin-3-O-glucoside (Isoquercitrin)    | 5.91E+06 | 0.94 | 1.86  | 0.77 |
| 58 | Flavonoids | Flavonols | -           | Quercetin-3-O-glucoside-7-O-rhamnoside     | 3.77E+06 | 0.60 | ND    | ND   |
| 59 | Flavonoids | Flavonols | 522-12-3    | Quercetin-3-O-rhamnoside(Quercitrin)       | 5.03E+06 | 0.80 | 4.04  | 0.74 |
| 60 | Flavonoids | Flavonols | -           | Quercetin-3-O-rhamnosyl(1→2)arabinoside    | 5.28E+04 | 0.01 | ND    | ND   |

|    |            |                       |             |                                       |          |      |       |      |
|----|------------|-----------------------|-------------|---------------------------------------|----------|------|-------|------|
| 61 | Flavonoids | Flavonols             | 52525-35-6  | Quercetin-3-O-robinobioside           | 6.26E+06 | 1.00 | ND    | ND   |
| 62 | Flavonoids | Flavonols             | 153-18-4    | Quercetin-3-O-rutinoside (Rutin)      | 6.98E+05 | 0.11 | 3.2   | 0.68 |
| 63 | Flavonoids | Flavonols             | 549-32-6    | Quercetin-3-O-xyloside (Reynoutrin)   | 3.16E+07 | 5.06 | 1.68  | 0.7  |
| 64 | Flavonoids | Flavonols             | 201463-36-7 | Quercetin-4'-O-glucuronide            | 2.93E+06 | 0.47 | ND    | ND   |
| 65 | Flavonoids | Flavonols             | -           | Quercetin-5-O-glucuronide             | 8.87E+06 | 1.42 | ND    | ND   |
| 66 | Flavonoids | Flavonols             | -           | Quercetin-7-O-(6"-malonyl)glucoside   | 2.34E+07 | 3.74 | ND    | ND   |
| 67 | Flavonoids | Flavonols             | 491-50-9    | Quercetin-7-O-glucoside               | 8.20E+06 | 1.31 | 2.85  | 0.79 |
| 68 | Flavonoids | Flavonols             | 571-74-4    | Sexangularetin                        | 1.23E+05 | 0.02 | 62.86 | 0.3  |
| 69 | Flavonoids | Flavonoid carbonoside | -           | Apigenin-6,8-di-C-arabinoside         | 2.72E+05 | 0.04 | ND    | ND   |
| 70 | Flavonoids | Flavonoid carbonoside | -           | Apigenin-6-C-(2"-glucosyl)arabinoside | 3.60E+07 | 5.76 | ND    | ND   |
| 71 | Flavonoids | Flavonoid carbonoside | -           | Apigenin-6-C-(2"-rhamnosyl)glucoside  | 2.42E+05 | 0.04 | ND    | ND   |
| 72 | Flavonoids | Flavonoid carbonoside | -           | Apigenin-6-C-arabinoside-8-C-xyloside | 1.27E+06 | 0.20 | ND    | ND   |
| 73 | Flavonoids | Flavonoid carbonoside | 29702-25-8  | Apigenin-6-C-glucoside (Isovitexin)   | 3.62E+06 | 0.58 | 31.29 | 0.72 |
| 74 | Flavonoids | Flavonoid carbonoside | -           | Apigenin-6-C-xyloside-8-C-arabinoside | 2.27E+06 | 0.36 | ND    | ND   |
| 75 | Flavonoids | Flavonoid carbonoside | -           | Apigenin-8-C-(2"-xylosyl)glucoside    | 4.04E+06 | 0.65 | ND    | ND   |
| 76 | Flavonoids | Flavonoid carbonoside | 3681-93-4   | Apigenin-8-C-Glucoside (Vitexin)      | 3.70E+06 | 0.59 | 3.05  | 0.71 |

|    |            |                       |            |                                                      |          |      |       |      |
|----|------------|-----------------------|------------|------------------------------------------------------|----------|------|-------|------|
| 77 | Flavonoids | Flavonoid carbonoside | 3682-02-8  | Isohemiphloin                                        | 4.53E+05 | 0.07 | ND    | ND   |
| 78 | Flavonoids | Flavonoid carbonoside | -          | Isovitexin-2"-O-rhamnoside                           | 1.22E+06 | 0.19 | ND    | ND   |
| 79 | Flavonoids | Flavonoid carbonoside | -          | Isovitexin-8-O-xylcoside                             | 9.31E+05 | 0.15 | ND    | ND   |
| 80 | Flavonoids | Flavonoid carbonoside | 29428-58-8 | Luteolin-6,8-di-C-glucoside                          | 2.19E+05 | 0.04 | 3.08  | 0.75 |
| 81 | Flavonoids | Flavonoid carbonoside | 4261-42-1  | Luteolin-6-C-glucoside (Isoorientin)                 | 1.56E+06 | 0.25 | 23.3  | 0.76 |
| 82 | Flavonoids | Flavonoid carbonoside | 28608-75-5 | Luteolin-8-C-glucoside (Orientin)                    | 5.47E+06 | 0.87 | 1.79  | 0.75 |
| 83 | Flavonoids | Flavonoid carbonoside | -          | Orientin-7-O-glucoside                               | 2.18E+06 | 0.35 | ND    | ND   |
| 84 | Flavonoids | Flavonoid carbonoside | 51938-32-0 | Schaftoside                                          | 1.33E+05 | 0.02 | 4.68  | 0.82 |
| 85 | Flavonoids | Flavonoid carbonoside | 61360-94-9 | Vitexin-2"-O-glucoside                               | 1.96E+06 | 0.31 | ND    | ND   |
| 86 | Flavonoids | Flavonoid carbonoside | 64820-99-1 | Vitexin-2"-O-rhamnoside                              | 2.41E+06 | 0.39 | 6.98  | 0.8  |
| 87 | Flavonoids | Flavonoid             | -          | "Vitexin-2""-O-xyloside"                             | 5.20E+06 | 0.83 | ND    | ND   |
| 88 | Flavonoids | Flavonoid             | 18085-97-7 | 4',5,7-Trihydroxy-3',6-dimethoxyflavone (Jaceosidin) | 7.80E+03 | 0.00 | 2.14  | 0.34 |
| 89 | Flavonoids | Flavonoid             | 5631-70-9  | 5,7,4'-Trimethoxyflavone                             | 1.04E+04 | 0.00 | 39.83 | 0.3  |
| 90 | Flavonoids | Flavonoid             | -          | 6-Hydroxyluteolin 5-glucoside                        | 1.60E+07 | 2.57 | ND    | ND   |
| 91 | Flavonoids | Flavonoid             | 480-36-4   | Acacetin-7-O-rutinoside (Linarin)                    | 1.22E+05 | 0.02 | 39.84 | 0.71 |

|     |            |           |            |                                                     |          |      |       |      |
|-----|------------|-----------|------------|-----------------------------------------------------|----------|------|-------|------|
| 92  | Flavonoids | Flavonoid | 55167-29-8 | Apiferol                                            | 4.93E+05 | 0.08 | ND    | ND   |
| 93  | Flavonoids | Flavonoid | 520-36-5   | Apigenin                                            | 3.72E+04 | 0.01 | 23.06 | 0.21 |
| 94  | Flavonoids | Flavonoid | 23666-13-9 | Apigenin-6,8-di-C-glucoside                         | 1.40E+07 | 2.23 | 3.42  | 0.78 |
| 95  | Flavonoids | Flavonoid | 5128-44-9  | Apigenin-7,4'-dimethyl ether                        | 1.83E+04 | 0.00 | 27.12 | 0.27 |
| 96  | Flavonoids | Flavonoid | -          | Apigenin-7,4'-di-O-Glucoside                        | 5.88E+03 | 0.00 | ND    | ND   |
| 97  | Flavonoids | Flavonoid | -          | Apigenin-7-O-(2"-glucosyl)arabinoside               | 4.22E+04 | 0.01 | ND    | ND   |
| 98  | Flavonoids | Flavonoid | 72741-92-5 | Apigenin-7-O-(6"-acetyl)glucoside                   | 4.17E+04 | 0.01 | ND    | ND   |
| 99  | Flavonoids | Flavonoid | -          | Apigenin-7-O-(6"-p-Coumaryl)glucoside               | 3.39E+05 | 0.05 | ND    | ND   |
| 100 | Flavonoids | Flavonoid | 578-74-5   | Apigenin-7-O-glucoside(Cosmosiin)                   | 3.92E+05 | 0.06 | 9.68  | 0.74 |
| 101 | Flavonoids | Flavonoid | 17306-46-6 | Apigenin-7-O-neohesperidoside<br>(Rhoifolin)        | 4.91E+05 | 0.08 | 6.68  | 0.77 |
| 102 | Flavonoids | Flavonoid | 552-57-8   | Apigenin-7-O-rutinoside (Isorhoifolin)              | 4.45E+05 | 0.07 | 7.86  | 0.75 |
| 103 | Flavonoids | Flavonoid | 28189-90-4 | Aromadendrin-7-O-glucoside                          | 6.75E+05 | 0.11 | ND    | ND   |
| 104 | Flavonoids | Flavonoid | -          | Butin-7-O-glucoside                                 | 1.75E+06 | 0.28 | ND    | ND   |
| 105 | Flavonoids | Flavonoid | 301-16-6   | Chrysoeriol-8-C-glucoside (Scoparin)                | 1.45E+05 | 0.02 | ND    | ND   |
| 106 | Flavonoids | Flavonoid | 520-34-3   | Diosmetin (5,7,3'-Trihydroxy-4'-methoxyflavone)     | 7.78E+04 | 0.01 | 31.14 | 0.27 |
| 107 | Flavonoids | Flavonoid | 520-27-4   | Diosmetin-7-O-rutinoside (Diosmin)                  | 9.66E+05 | 0.15 | 12.7  | 0.66 |
| 108 | Flavonoids | Flavonoid | 22368-21-4 | Eupatilin (5,7-Dihydroxy-3',4',6-Trimethoxyflavone) | 3.20E+03 | 0.00 | 29.39 | 0.38 |
| 109 | Flavonoids | Flavonoid | 548-83-4   | Galangin (3,5,7-Trihydroxyflavone)                  | 6.87E+04 | 0.01 | 45.55 | 0.21 |
| 110 | Flavonoids | Flavonoid | 31712-49-9 | Hesperetin-7-O-glucoside                            | 2.27E+06 | 0.36 | 7.69  | 0.82 |
| 111 | Flavonoids | Flavonoid | -          | Kaempferol-3-O-(2"-p-Coumaroyl)galactoside          | 9.14E+06 | 1.46 | ND    | ND   |
| 112 | Flavonoids | Flavonoid | -          | Kaempferol-3-O-(3"-O-p-                             | 7.54E+05 | 0.12 | ND    | ND   |

|     |            |           |            |                                                   |          |      |       |      |
|-----|------------|-----------|------------|---------------------------------------------------|----------|------|-------|------|
|     |            |           |            | Coumaroyl)rhamnoside                              |          |      |       |      |
| 113 | Flavonoids | Flavonoid | -          | Kaempferol-3-O-(4"-O-acetyl)rhamnoside            | 5.21E+04 | 0.01 | ND    | ND   |
| 114 | Flavonoids | Flavonoid | -          | Kaempferol-3-O-(4"-O-p-Coumaroyl)rhamnoside       | 1.05E+06 | 0.17 | ND    | ND   |
| 115 | Flavonoids | Flavonoid | -          | Kaempferol-3-O-(6"-galloyl)galactoside            | 1.30E+06 | 0.21 | ND    | ND   |
| 116 | Flavonoids | Flavonoid | 56317-05-6 | Kaempferol-3-O-(6"-galloyl)glucoside              | 1.42E+06 | 0.23 | ND    | ND   |
| 117 | Flavonoids | Flavonoid | -          | Kaempferol-3-O-arabinoside                        | 7.11E+06 | 1.14 | ND    | ND   |
| 118 | Flavonoids | Flavonoid | -          | Kaempferol-3-O-rhamnosyl(1→2)glucoside            | 4.15E+05 | 0.07 | ND    | ND   |
| 119 | Flavonoids | Flavonoid | 17650-84-9 | Kaempferol-3-O-rutinoside(Nicotiflorin)           | 1.30E+07 | 2.08 | 3.64  | 0.73 |
| 120 | Flavonoids | Flavonoid | 19895-95-5 | Kaempferol-3-O-sophoroside                        | 2.39E+05 | 0.04 | 5.3   | 0.71 |
| 121 | Flavonoids | Flavonoid | -          | Kaempferol-4'-O-glucoside                         | 3.08E+06 | 0.49 | ND    | ND   |
| 122 | Flavonoids | Flavonoid | -          | Limocitrin-3-O-galactoside                        | 1.08E+05 | 0.02 | ND    | ND   |
| 123 | Flavonoids | Flavonoid | 491-70-3   | Luteolin (5,7,3',4'-Tetrahydroxyflavone)          | 7.77E+05 | 0.12 | 36.16 | 0.25 |
| 124 | Flavonoids | Flavonoid | 5154-41-6  | Luteolin-3'-O-glucoside                           | 1.53E+05 | 0.02 | ND    | ND   |
| 125 | Flavonoids | Flavonoid | 6920-38-3  | Luteolin-4'-O-glucoside                           | 2.88E+06 | 0.46 | 35.94 | 0.79 |
| 126 | Flavonoids | Flavonoid | -          | Luteolin-7-O-(6"-caffeoyl)rhamnoside              | 5.35E+06 | 0.85 | ND    | ND   |
| 127 | Flavonoids | Flavonoid | -          | Luteolin-7-O-(6"-malonyl)glucoside                | 4.09E+04 | 0.01 | ND    | ND   |
| 128 | Flavonoids | Flavonoid | 5373-11-5  | Luteolin-7-O-glucoside (Cynaroside)               | 1.62E+07 | 2.60 | ND    | ND   |
| 129 | Flavonoids | Flavonoid | 29741-10-4 | Luteolin-7-O-glucuronide                          | 4.12E+06 | 0.66 | 2.62  | 0.8  |
| 130 | Flavonoids | Flavonoid | 25694-72-8 | Luteolin-7-O-neohesperidoside (Lonicerin)         | 7.02E+05 | 0.11 | 3.84  | 0.73 |
| 131 | Flavonoids | Flavonoid | -          | Naringenin-4'-O-glucoside                         | 2.18E+06 | 0.35 | ND    | ND   |
| 132 | Flavonoids | Flavonoid | 520-11-6   | Nepetin (5,7,3',4'-Tetrahydroxy-6-methoxyflavone) | 2.14E+05 | 0.03 | 26.75 | 0.31 |

|     |            |           |             |                                                       |          |      |       |      |
|-----|------------|-----------|-------------|-------------------------------------------------------|----------|------|-------|------|
| 133 | Flavonoids | Flavonoid | 490-31-3    | Robinetin                                             | 9.78E+05 | 0.16 | 6.35  | 0.28 |
| 134 | Flavonoids | Flavonoid | 20310-89-8  | Saponarin(Isovitexin-7-O-glucoside)                   | 4.96E+05 | 0.08 | 3.04  | 0.77 |
| 135 | Flavonoids | Flavonoid | 4423-37-4   | Syringetin                                            | 6.44E+03 | 0.00 | 36.82 | 0.37 |
| 136 | Flavonoids | Flavonoid | 603-61-2    | Tamarixetin (3,3',5,7-Tetrahydroxy-4'-Methoxyflavone) | 3.40E+03 | 0.00 | 32.86 | 0.31 |
| 137 | Flavonoids | Flavonoid | 520-28-5    | Tectochrysin                                          | 2.27E+03 | 0.00 | 9.57  | 0.2  |
| 138 | Flavonoids | Flavonoid | -           | Tetahydroxyflavone-7-O-glucuronide                    | 1.88E+06 | 0.30 | ND    | ND   |
| 139 | Flavonoids | Flavonoid | 520-31-0    | Tricetin (5,7,3',4',5'-Pentahydroxyflavone)           | 3.42E+06 | 0.55 | 28.87 | 0.28 |
| 140 | Flavonoids | Flavonoid | 520-32-1    | Tricin (5,7,4'-Trihydroxy-3',5'-dimethoxyflavone)     | 2.13E+05 | 0.03 | 27.86 | 0.34 |
| 141 | Flavonoids | Flavonoid | 32769-01-0  | Tricin-7-O-Glucoside                                  | 3.10E+06 | 0.50 | 5.68  | 0.85 |
| 142 | Flavonoids | Flavonoid | -           | Tricin-7-O-Glucuronide                                | 4.74E+04 | 0.01 | ND    | ND   |
| 143 | Flavonoids | Flavonoid | 53766-40-8  | Tricin-7-O-neohesperidoside                           | 3.52E+04 | 0.01 | ND    | ND   |
| 144 | Flavonoids | Flavanols | -           | 4'-Hydroxy-5,7-dimethoxyflavanone                     | 6.34E+06 | 1.01 | ND    | ND   |
| 145 | Flavonoids | Flavanols | -           | 5,7,3',4',5'-Pentahydroxyflavan (Tricetiflavan)       | 6.32E+06 | 1.01 | ND    | ND   |
| 146 | Flavonoids | Flavanols | 81555-08-0  | 8,8'-Methylenebiscatechin                             | 4.77E+05 | 0.08 | ND    | ND   |
| 147 | Flavonoids | Flavanols | 154-23-4    | Catechin                                              | 2.90E+06 | 0.46 | ND    | ND   |
| 148 | Flavonoids | Flavanols | 130405-40-2 | Catechin gallate                                      | 1.33E+06 | 0.21 | ND    | ND   |
| 149 | Flavonoids | Flavanols | -           | Catechin-5-O-glucoside                                | 7.45E+04 | 0.01 | ND    | ND   |
| 150 | Flavonoids | Flavanols | -           | Catechin-catechin-catechin                            | 1.89E+06 | 0.30 | ND    | ND   |
| 151 | Flavonoids | Flavanols | 24808-04-6  | Epiafzelechin                                         | 9.31E+05 | 0.15 | ND    | ND   |
| 152 | Flavonoids | Flavanols | 490-46-0    | Epicatechin                                           | 7.24E+06 | 1.16 | 28.93 | 0.24 |
| 153 | Flavonoids | Flavanols | 1257-08-5   | Epicatechin gallate                                   | 1.12E+06 | 0.18 | ND    | ND   |



|     |            |                 |            |                                               |          |      |       |      |
|-----|------------|-----------------|------------|-----------------------------------------------|----------|------|-------|------|
| 154 | Flavonoids | Flavanols       | -          | Epicatechin glucoside                         | 1.11E+06 | 0.18 | ND    | ND   |
| 155 | Flavonoids | Flavanols       | -          | Epicatechin-epiafzelechin                     | 3.78E+05 | 0.06 | ND    | ND   |
| 156 | Flavonoids | Flavanols       | 970-74-1   | Epigallocatechin                              | 2.46E+05 | 0.04 | ND    | ND   |
| 157 | Flavonoids | Flavanols       | 989-51-5   | Epigallocatechin-3-gallate                    | 5.03E+06 | 0.80 | ND    | ND   |
| 158 | Flavonoids | Flavanols       | 970-73-0   | Gallocatechin                                 | 4.12E+06 | 0.66 | ND    | ND   |
| 159 | Flavonoids | Flavanols       | 5127-64-0  | Gallocatechin 3-O-gallate                     | 6.43E+05 | 0.10 | ND    | ND   |
| 160 | Flavonoids | Dihydroflavonol | 52117-69-8 | 3-O-Acetylpinobanksin                         | 1.34E+06 | 0.21 | ND    | ND   |
| 161 | Flavonoids | Dihydroflavonol | 480-20-6   | Aromadendrin (Dihydrokaempferol)              | 6.88E+05 | 0.11 | 24.15 | 0.24 |
| 162 | Flavonoids | Dihydroflavonol | 27200-12-0 | Dihydromyricetin (Ampelopsin)                 | 2.37E+05 | 0.04 | ND    | ND   |
| 163 | Flavonoids | Dihydroflavonol | 480-18-2   | Dihydroquercetin(Taxifolin)                   | 2.13E+06 | 0.34 | 57.84 | 0.27 |
| 164 | Flavonoids | Dihydroflavonol | 20725-03-5 | Fustin                                        | 1.05E+04 | 0.00 | ND    | ND   |
| 165 | Flavonoids | Dihydroflavonol | 548-82-3   | Pinobanksin                                   | 2.02E+05 | 0.03 | ND    | ND   |
| 166 | Flavonoids | Dihydroflavone  | -          | 5,7,3',4',5'-Pentahydroxydihydroflavone       | 1.77E+06 | 0.28 | ND    | ND   |
| 167 | Flavonoids | Dihydroflavone  | 492-14-8   | Butin                                         | 1.32E+05 | 0.02 | ND    | ND   |
| 168 | Flavonoids | Dihydroflavone  | 552-58-9   | Eriodictyol (5,7,3',4'-Tetrahydroxyflavanone) | 5.81E+05 | 0.09 | ND    | ND   |
| 169 | Flavonoids | Dihydroflavone  | -          | Eriodictyol-7-O-(6"-malonyl)glucoside         | 8.09E+05 | 0.13 | ND    | ND   |
| 170 | Flavonoids | Dihydroflavone  | 480-41-1   | Naringenin (5,7,4'-Trihydroxyflavanone)       | 6.12E+05 | 0.10 | 42.36 | 0.21 |
| 171 | Flavonoids | Dihydroflavone  | 529-55-5   | Naringenin-7-O-glucoside (Prunin)             | 2.24E+06 | 0.36 | 9.33  | 0.74 |
| 172 | Flavonoids | Dihydroflavone  | 10236-47-2 | Naringenin-7-O-Neohesperidoside(Naringin)     | 1.35E+05 | 0.02 | ND    | ND   |
| 173 | Flavonoids | Dihydroflavone  | 14259-46-2 | Naringenin-7-O-Rutinoside(Narirutin)          | 3.27E+04 | 0.01 | ND    | ND   |
| 174 | Flavonoids | Chalcones       | 14917-41-0 | 3,4,2',4',6'-Pentahydroxychalcone             | 2.63E+04 | 0.00 | ND    | ND   |
| 175 | Flavonoids | Chalcones       | -          | Dihydrochalcone-4'-O-glucoside                | 6.57E+06 | 1.05 | ND    | ND   |
| 176 | Flavonoids | Chalcones       | 4547-85-7  | Isosalipurposide (Phlorizin Chalcone)         | 5.23E+05 | 0.08 | ND    | ND   |

|     |            |                       |            |                                        |          |      |       |      |
|-----|------------|-----------------------|------------|----------------------------------------|----------|------|-------|------|
| 177 | Flavonoids | Chalcones             | 73692-50-9 | Naringenin chalcone                    | 1.91E+05 | 0.03 | ND    | ND   |
| 178 | Flavonoids | Chalcones             | 60-82-2    | Phloretin                              | 3.42E+05 | 0.05 | ND    | ND   |
| 179 | Flavonoids | Chalcones             | -          | Phloretin-2'-O-(6"-O-xylosyl)glucoside | 8.85E+04 | 0.01 | ND    | ND   |
| 180 | Flavonoids | Chalcones             | 60-81-1    | Phloretin-2'-O-glucoside (Phlorizin)   | 3.87E+06 | 0.62 | 2.88  | 0.6  |
| 181 | Flavonoids | Chalcones             | 4192-90-9  | Phloretin-4'-O-glucoside (Trilobatin)  | 2.03E+06 | 0.32 | ND    | ND   |
| 182 | Flavonoids | Anthocyanins          | 47705-70-4 | Cyanidin-3-O-glucoside (Kuromanin)     | 3.24E+06 | 0.52 | ND    | ND   |
| 183 | Tannins    | Tannin                | 18483-17-5 | 1,3,6-Tri-O-galloyl-D-glucose          | 5.05E+06 | 0.81 | 3.01  | 0.54 |
| 184 | Tannins    | Tannin                | -          | 1,6-Di-O-Galloyl-D-Glucose             | 2.07E+06 | 0.33 | ND    | ND   |
| 185 | Tannins    | Tannin                | 58511-73-2 | 1-O-Galloyl-D-glucose                  | 1.36E+05 | 0.02 | ND    | ND   |
| 186 | Tannins    | Tannin                | -          | 1-O-Galloyl-rhamnose                   | 5.71E+03 | 0.00 | ND    | ND   |
| 187 | Tannins    | Tannin                | 88038-12-4 | Cinnamtannin B2                        | 4.47E+05 | 0.07 | ND    | ND   |
| 188 | Tannins    | Tannin                | 76250-49-2 | Gambiriin A1                           | 2.34E+05 | 0.04 | ND    | ND   |
| 189 | Tannins    | Proanthocyanidin<br>s | 41743-41-3 | Procyanidin A2                         | 1.38E+05 | 0.02 | 12.25 | 0.4  |
| 190 | Tannins    | Proanthocyanidin<br>s | 20315-25-7 | Procyanidin B2                         | 1.92E+06 | 0.31 | 67.87 | 0.66 |
| 191 | Tannins    | Proanthocyanidin<br>s | 37064-30-5 | Procyanidin C1                         | 7.52E+05 | 0.12 | 18.98 | 0.1  |

OB, oral bioavailability; DL, drug-likeness; NI: no information has been found.
