# Supplementary material for: Hawk Tea Flavonoids as Natural Hepatoprotective Agents Alleviate Acute Liver Damage by Reshaping the Intestinal Microbiota and Modulating the Nrf2 and NF-κB Signaling Pathways
Source: MDPI journal article supplement (doi:10.3390/nu14173662), 2022-09-05
Supplement: s1 [file s1]

**|Table S2. The Product Codes of Antibodies and ELISA Kit**

| Antibodies | Product Codes | Source                  | Dilution ratio |
|------------|---------------|-------------------------|----------------|
| TLR4       | 66350-1-Ig    | Proteintech Group, Inc. | 1:4000         |
| MyD88      | 67969-1-Ig    | Proteintech Group, Inc. | 1:5000         |
| NRF2       | 16396-1-AP    | Proteintech Group, Inc. | 1:3000         |
| HO-1       | 66743-1-Ig    | Proteintech Group, Inc. | 1:3000         |
| NF-kappaB  | 80979-1-RR    | Proteintech Group, Inc. | 1:20000        |
| GAPDH      | 10494-1-AP    | Proteintech Group, Inc. | 1:20000        |

| ELISA Kit     | Product Codes | Source                                     |
|---------------|---------------|--------------------------------------------|
| IL-6          | H007-1-1      | Nanjing Jiancheng Bioengineering Institute |
| IL-1 $\beta$  | H002          | Nanjing Jiancheng Bioengineering Institute |
| TNF- $\alpha$ | H052-1        | Nanjing Jiancheng Bioengineering Institute |

---

**Observed molecular weight**

---

96 kDa

33 kDa

110 kDa

33 kDa

65 kDa

---

36 kDa
