# Supplementary figures and images for: Hawk Tea Flavonoids as Natural Hepatoprotective Agents Alleviate Acute Liver Damage by Reshaping the Intestinal Microbiota and Modulating the Nrf2 and NF-κB Signaling Pathways
Source: MDPI journal article supplement (doi:10.3390/nu14173662), 2022-09-05

Figure S1

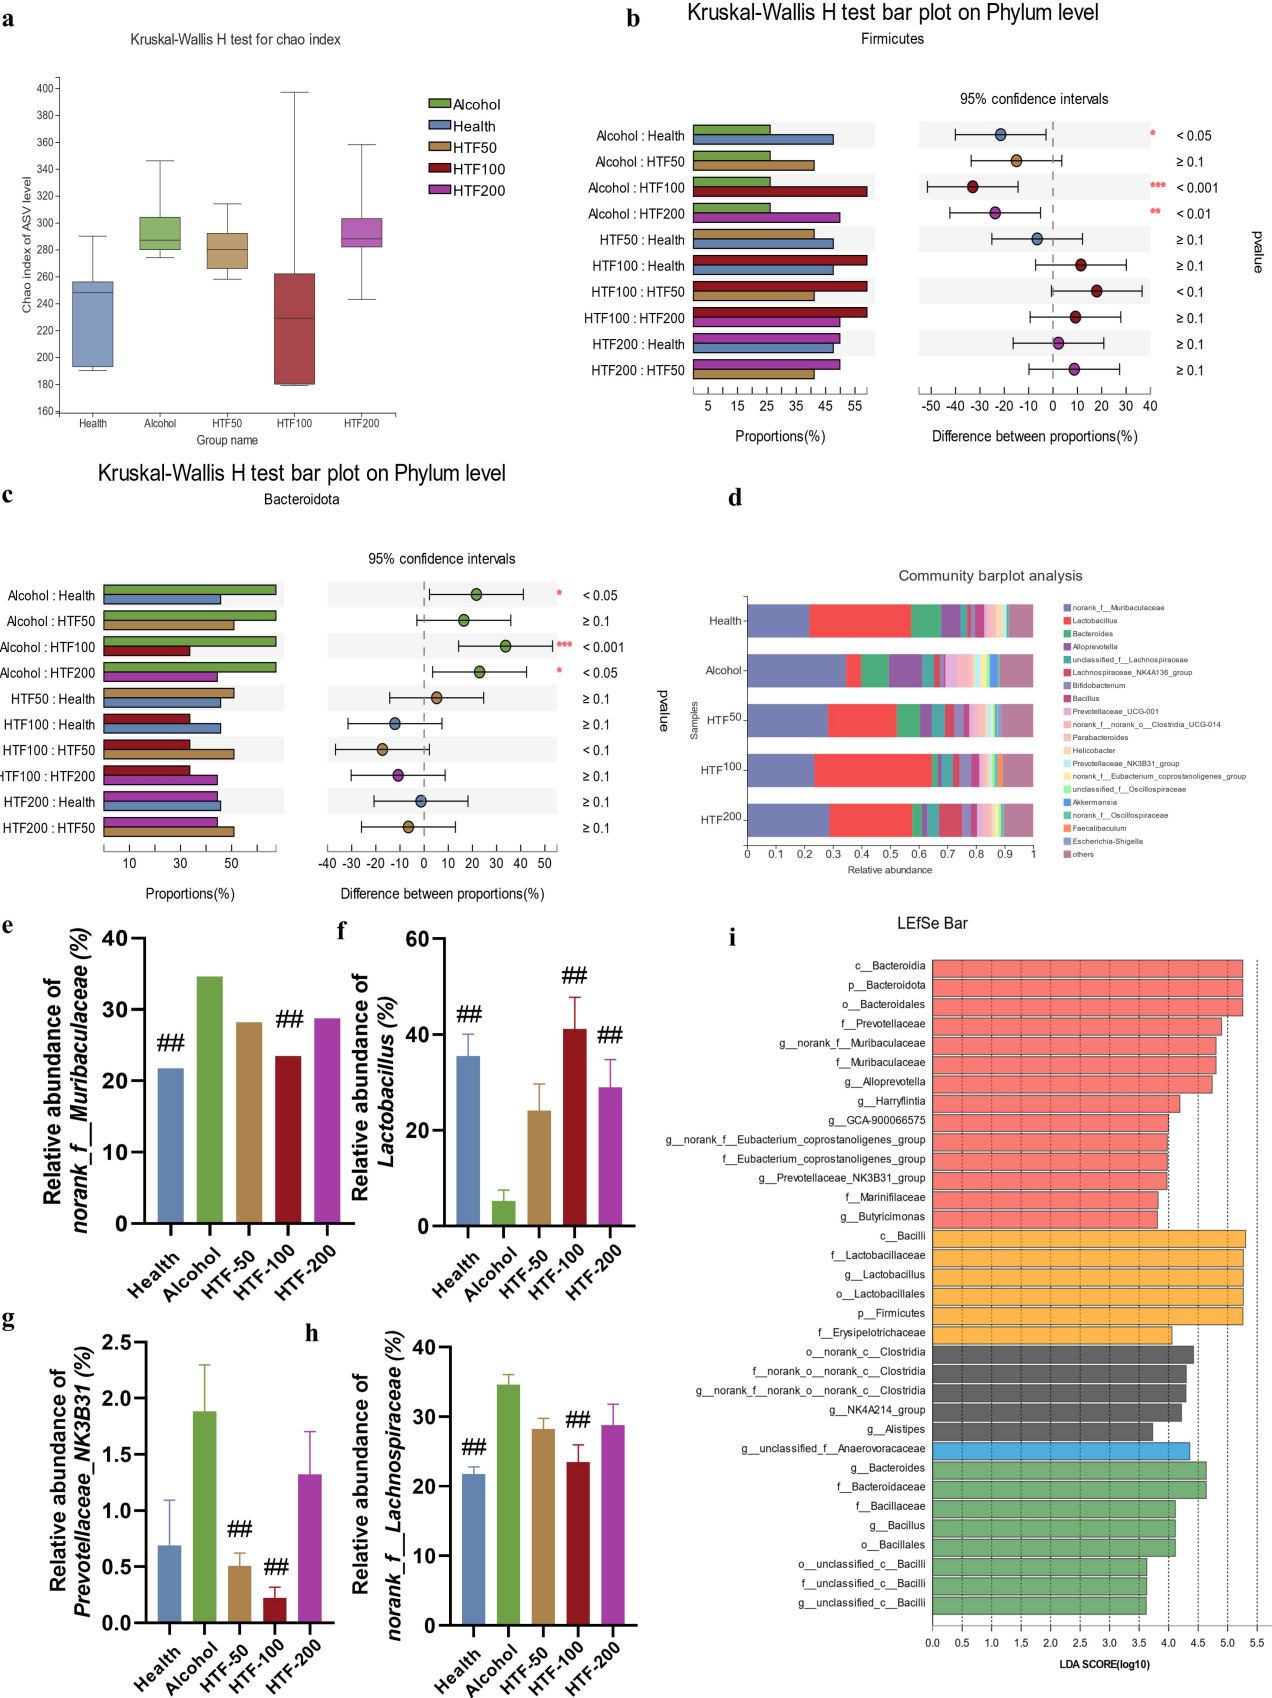

Supplement: s1 [file s1]
